# Supplementary material
Source: Research Square preprint supplement (doi:10.21203/rs.3.rs-9316409/v1)
Supplement: Supplementary file 1 [file ecc777f1c4cbd0a94cbc0a72.pdf]

# Supplemental Materials: Neural Network Discovers Paired Wigner Crystal in Artificial Graphene

Conor Smith <sup>1,2</sup> Yubo Yang (杨煜波) <sup>1,3</sup> Zhou-Quan Wan <sup>1</sup>  
Yixiao Chen (陈一潇) <sup>4</sup> Miguel A. Morales <sup>1</sup> and Shiwei Zhang <sup>1</sup>

<sup>1</sup>*Center for Computational Quantum Physics,  
Flatiron Institute, New York, NY, 10010, USA*

<sup>2</sup>*Department of Electrical and Computer Engineering,  
University of New Mexico, Albuquerque, NM 87131, USA*

<sup>3</sup>*Department of Physics and Astronomy, Hofstra University, Hempstead, NY, 11549, USA*

<sup>4</sup>*ByteDance Seed*

## HAMILTONIAN

We study the ground state of holes in a semiconductor heterobilayer, a cartoon of which is shown in Fig. 1a of the main text, using the following moiré continuum Hamiltonian

$$\hat{H} = -\frac{1}{2} \sum_i \nabla_i^2 - V_m/W \sum_i \Lambda(\mathbf{r}_i) + r_s \sum_{i < j} \frac{1}{|\mathbf{r}_i - \mathbf{r}_j|}, \quad (1)$$

which assumes that the holes are confined to a single layer while the presence of the other layer can be modeled by an effective potential of the form  $\Lambda(\mathbf{r}) = 2 \sum_{j=1}^3 \cos(\mathbf{r} \cdot \mathbf{g}_j + \phi)$ . The vectors  $\mathbf{g}_j$  are defined as the moiré unit cell's three smallest reciprocal lattice vectors and  $\phi$  controls the shape of the potential, which we set to  $\phi = 60^\circ \pm n120^\circ$  to model the honeycomb potential realized in artificial graphene. The parameter  $V_m$  controls the depth of the moiré potential. The effective Bohr radius  $a_B^* \equiv \frac{\hbar^2}{|m^*|} / \frac{e^2}{4\pi\epsilon}$  is used as length unit and the Fermi energy of the unpolarized gas  $W = \frac{\hbar^2}{|m^*| r_s^2}$  is used as the energy unit. All values are given in Hartree atomic units. The Wigner-Seitz radius in Bohr units,  $r_s$ , controls the strength of Coulomb interaction relative to the kinetic energy.

## THE ANSATZ

We largely use an identical ansatz as described in Ref. [1]. The main idea is to construct a determinant of orbitals built with a learnable linear combination of planewaves:

$$\phi_a(\mathbf{q}_b) = \sum_{k=1}^{N_k} c_{ak} \exp(i\mathbf{G}_k \cdot \mathbf{q}_b) \quad (2)$$

where  $c_{ak}$  is learnable and  $\mathbf{q}_b$  is a quasiposition generated by a backflow transformation as:

$$\mathbf{q}_b = \mathbf{r}_b + \mathcal{N}(\mathbf{R}) \quad (3)$$

with  $\mathbf{r}_b$  denoting the position of particle  $b$  and  $\mathbf{R}$  denoting all particle positions.

The backflow transformation is based on the message passing neural network developed in Ref. [2]. The idea is to iteratively update one-body and two-body hidden vectors,  $\mathbf{h}_i$  and  $\mathbf{h}_{ij}$ , with an attention mechanism. In more detail, the state at layer  $t$  is given by

$$\mathbf{g}_i^{(t)} = \left[ \mathbf{h}_i^{(t-1)} \right], \quad \mathbf{g}_{ij}^{(t)} = \left[ \mathbf{v}_{ij}, \mathbf{h}_{ij}^{(t-1)} \right] \quad (4)$$

$$\mathbf{h}_i^{(t)} = \mathcal{F}_1^{(t)} \left( \sum_{j \neq i} \mathbf{m}_{ij}^{(t)}, \mathbf{g}_i^{(t)} \right) + \mathbf{h}_i^{(t-1)}, \quad \mathbf{h}_{ij}^{(t)} = \mathcal{F}_2^{(t)} \left( \mathbf{m}_{ij}^{(t)}, \mathbf{g}_{ij}^{(t)} \right) + \mathbf{h}_{ij}^{(t-1)} \quad (5)$$

$$\mathbf{m}_{ij}^{(t)} = \mathcal{A}_{ij}^{(t)} \left( \mathbf{g}_{ij}^{(t)} \right) \odot \mathcal{F}_m^{(t)} \left( \mathbf{g}_{ij}^{(t)} \right), \quad (6)$$

|                        | dimensions | layers |
|------------------------|------------|--------|
| Iterations             |            | 3      |
| $W_{k/q}$              | 32         | 1      |
| $\mathcal{F}_m$        | 32         | 1      |
| $h_i/\mathcal{F}_1$    | 32         | 2      |
| $h_{ij}/\mathcal{F}_1$ | 26         | 2      |
| $\mathcal{J}$          | 32         | 3      |

TABLE I: Neural Network Hyperparameters

where  $\mathcal{F}_{h_1}^{(t)}$ ,  $\mathcal{F}_{h_2}^{(t)}$  and  $\mathcal{F}_m^{(t)}$  are multi-layer perceptrons (MLPs). The visible state  $\mathbf{v}_{ij}$  is a periodized displacement and distance vector given by,

$$\mathbf{v}_{ij} = \left[ \cos(2\pi A^{-1}\mathbf{r}_{ij}), \sin(2\pi A^{-1}\mathbf{r}_{ij}), \|\sin(\pi A^{-1}\mathbf{r}_{ij})\|, \|\cos(\pi A^{-1}\mathbf{r}_{ij})\|, s_{ij} \right] \quad (7)$$

with  $A$  being the lattice vectors of the supercell and  $s_{ij} = 2\delta_{\sigma_i\sigma_j-1}$  where  $\sigma_i$  is the spin of particle  $i$ . The message,  $m_{ij}$ , is the element-wise multiplication of an MLP transformation of  $g_{ij}$  with an attention matrix defined as

$$\mathcal{A}_{ij}^{(t)} = \text{Linear}^{(t)} \circ \text{GELU} \left( \frac{1}{\sqrt{N}} \sum_l^N \mathbf{q}_{il}^{(t)} \mathbf{k}_{lj}^{(t)} \right), \quad (8)$$

$$\mathbf{q}_{ij}^{(t)} = W_q^{(t)} \cdot \mathbf{g}_{ij}^{(t)}, \quad \mathbf{k}_{ij}^{(t)} = W_k^{(t)} \cdot \mathbf{g}_{ij}^{(t)}. \quad (9)$$

To describe the backflow, we simply take the final one-body hidden state,  $\mathbf{h}_i^{(L)}$ , with  $L$  denoting the last layer, and apply one more MLP so that:

$$\mathcal{N}(\vec{R}) = \mathcal{F}_{bf}(h_i^{(L)}). \quad (10)$$

The Jastrow is also derived from the same one-body hidden state via another MLP:

$$\mathcal{J}_\theta(\vec{R}) = \sum_i \mathcal{F}_J([\mathbf{v}_i, h_i^{(L)}]). \quad (11)$$

We explicitly break translational invariance in the Jastrow by including one-body positional information,  $\mathbf{v}_i = [\sin(2\pi A^{-1}\mathbf{r}_i), \cos(2\pi A^{-1}\mathbf{r}_i)]$  with  $A$  being the matrix of lattice vectors of the supercell. This choice is motivated by the fact that the moiré potential breaks continuous translational invariance (while remaining periodic).

We can compactly write the full wavefunction as

$$\Psi(\vec{r}) = \det \{ \langle \mathbf{q}_j; \sigma_j | \phi_a; \chi_a \rangle \} \exp \left( \mathcal{J}_{cck}(\vec{R}) + \mathcal{J}_\theta(\vec{R}) \right), \quad (12)$$

where orbital  $\chi_a$  is an eigenstate of  $\hat{s}_z$  allowing us to write the wavefunction as product of spin- $\uparrow$  and spin- $\downarrow$  determinants. Finally,  $\mathcal{J}_{cck}$  is the analytical form defined by Ceperley, Chester, and Kalos [3].

## OPTIMIZATION AND SAMPLING

We use the SPRING algorithm [4] to update the parameters as:

$$d\theta_t = (S + \lambda I)^{-1} (g + \lambda \mu d\theta_{t-1}) \quad (13)$$

$$\theta_{t+1} = \theta_t - \eta d\theta_t \quad (14)$$

|           |                    |
|-----------|--------------------|
| $\lambda$ | $1 \times 10^{-3}$ |
| $\mu$     | 0.9                |
| $\eta$    | $O(0.1)$           |
| Decay     | 1000               |
| Samples   | 1024               |

TABLE II: Optimization Hyperparameters

where  $\theta_t$  are the parameters of the NQS at step  $t$ ,  $S$  is the quantum Fisher matrix and  $g$  are the gradients. The learning rate is given by  $\eta$ ,  $\lambda$  is the damping term applied to the Fisher matrix, and  $\mu > 0$  introduces a term analogous to momentum in first-order methods while  $\mu = 0$  reduces to standard stochastic reconfiguration [5]. To invert the S matrix we use minSR [6, 7]. Hyperparameters are given in Table II.

To sample from the wavefunction we use Metropolis Adjusted Langevin Algorithm [8] where samples are proposed according to:

$$\tilde{r} = r + \tau \nabla \log |\psi(r)|^2 + \sqrt{\tau} \varepsilon \quad (15)$$

and  $\varepsilon$  is randomly drawn from a Gaussian distribution. The step size,  $\tau$ , is tuned adaptively to target a harmonic average of acceptance rate at 65%. We propose and accept/reject 20 updates and use only the last to calculate energies and gradients when training the wavefunction.

### BCS-TYPE WAVEFUNCTION DETAILS

In this section, we present the BCS-type wavefunction referenced in the main text. We stress here that this wavefunction is not necessary to find the PWC but it does produce a lower energy than the determinant based ansatz. This is important because it is not that our work is biased to encourage pairing but rather that the apparent pairing motivated us to implement a wavefunction which can describe pairing more explicitly. To explain the form of this wavefunction, we begin with an unpaired determinant of two spin species which we can express as a product of two determinants:

$$\Psi(\vec{x}) = \left| \Phi^{(\uparrow)} \left[ \vec{x}^{(\uparrow)} \right] \right| \cdot \left| \Phi^{(\downarrow)} \left[ \vec{x}^{(\downarrow)} \right] \right| \quad (16)$$

where:

$$\Phi^{(\alpha)} \left[ \vec{x}^{(\alpha)} \right] = \begin{bmatrix} \phi_0^{(\alpha)}(x_0) & \phi_1^{(\alpha)}(x_0) & \cdots & \phi_{N^{(\alpha)}-1}^{(\alpha)}(x_0) \\ \phi_0^{(\alpha)}(x_1) & \phi_1^{(\alpha)}(x_1) & \cdots & \phi_{N^{(\alpha)}-1}^{(\alpha)}(x_1) \\ \vdots & \vdots & \ddots & \vdots \\ \phi_0^{(\alpha)}(x_{N^{(\alpha)}-1}) & \phi_1^{(\alpha)}(x_{N^{(\alpha)}-1}) & \cdots & \phi_{N^{(\alpha)}-1}^{(\alpha)}(x_{N^{(\alpha)}-1}) \end{bmatrix}. \quad (17)$$

If  $\Phi^{(\alpha)}$  is chosen to be spin-independent, the ansatz reduces to the restricted Hartree-Fock (RHF) state, which was employed in our previous simulations.

For case of  $N^{(\uparrow)} = N^{(\downarrow)}$ , we may alternatively employ a BCS-like wave function of the form  $|\Psi_{\text{BCS}}\rangle = (F_{kk'} c_{k\uparrow}^\dagger c_{k'\downarrow}^\dagger)^{N/2}$ , where  $F$  is the pairing matrix and  $c_k^\dagger$  creates an electron in the plane-wave basis. In practice, however, the dimension of the plane-wave basis is much larger than the number of electrons, rendering a full parameterization of the pairing matrix  $F_{ij}$  inefficient. To reduce the number of variational parameters, we first construct a reduced set of  $n_{\text{orb}} > N/2$  single-particle orbitals from the plane-wave basis,  $c_{i\alpha}^\dagger = \sum_{\vec{k}} A_{i,\vec{k}}^\alpha c_{\vec{k}}^\dagger$ , where  $i$  labels the orbital index and  $A^\alpha$  are variational orbital-parameter matrices. The BCS-like wave function can then be written as  $|\Psi_{\text{BCS}}\rangle = (\sum_i S_i c_{i\uparrow}^\dagger c_{i\downarrow}^\dagger)^{N/2}$ , where  $S_i$  are diagonal pairing parameters. This form is sufficient because any non-diagonal structure of the pairing matrix can be absorbed into the orbital rotations encoded in  $A^\alpha$ , leaving only the diagonal pairing amplitudes  $S_i$  as independent variational parameters. In our simulations, we typically choose the orbital dimension to be  $n_{\text{orb}} = N^\uparrow + N^\downarrow$ .

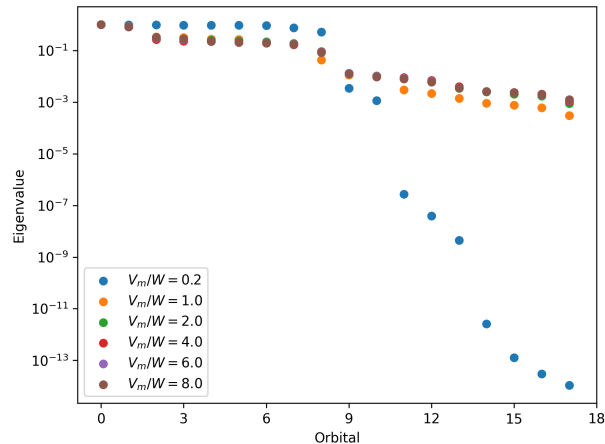

FIG. 1: Eigenvalues of orbitals in the projected-BCS wavefunction

77 To be more explicit, in real-space coordinates  $\vec{x}$  the BCS-like wave function can be evaluated as

$$\Psi(\vec{x}) = \det \left[ \Phi^{(\uparrow)} \left[ \vec{x}^{(\uparrow)} \right] S \left( \Phi^{(\downarrow)} \left[ \vec{x}^{(\downarrow)} \right] \right)^T \right], \quad (18)$$

78 where  $\Phi^\alpha \in \mathbb{C}^{N^\alpha, n_{\text{orb}}}$  are the spin-resolved orbital matrices, defined as in Eq. (17) but with an enlarged  
79 orbital dimension  $n_{\text{orb}} > N^\alpha$ .

80 Both the standard form in Eq. 16 and the BCS form identify the PWC as the lowest-energy state. However,  
81 the BCS wave function consistently yields a lower variational energy. A detailed comparison of the energies  
82 is presented in Table IV where we also include the energy of the fully polarized system to illustrate the  
83 energy lowering from pairing electrons in singlets. To better illustrate the structure encoded by the BCS  
84 wave function, we compute the occupation amplitudes, defined as the singular values of the effective pairing  
85 matrix in the present parameterization,  $F \equiv A^{(\downarrow)T} S A^{(\uparrow)}$ . These occupation amplitudes generally differ from  
86 the diagonal matrix  $S$  because no orthogonality constraint is imposed on the orbital operators  $c_{i,\alpha}^\dagger$ . In Fig. 1,  
87 we plot the occupation amplitudes for different values of  $V_m/W$ . For  $V_m/W = 0.1$ , where the ground state  
88 is expected to be well captured by an RHF-like wave function, the occupation amplitudes exhibit a sharp  
89 drop at the  $N/2$ -th largest value, indicating that the state effectively reduces to an RHF state. As  $V_m/W$   
90 is increased and the paired Wigner crystal phase emerges, the occupation amplitudes display qualitatively  
91 different behavior compared to the  $V_m/W = 0.1$ . In particular, the tail of the occupation spectrum persists  
92 and becomes increasingly pronounced with increasing  $V_m/W$ . This behavior provides evidence that the  
93 pairing mechanism encoded in the BCS wave function plays an essential role in stabilizing the paired Wigner  
94 crystal phase, consistent with the observed lowering of the variational energy.  
95

## 96 COMPARING ENERGIES OF CANDIDATE GROUND STATES

97 It is always possible that there is a state lower in energy that is qualitatively different than the PWC.  
98 However, in this section we provide more evidence supporting the fact that it is the ground state by comparing  
99 with various candidate states and providing energies from DMC.

100 In Table III, we compare the energies obtained with the neural network with and without the BCS  
101 determinant to those obtained with DMC. The LDA orbitals do not find the PWC but find comparable  
102 energies to the BCS ansatz when the LDA orbitals are used in a DMC calculation. To ensure that the PWC  
103 we find is not explicitly the result of a bias in our ansatz, we test DMC with orbitals obtained from the  
104 ansatz. Both cases are lower than LDA-DMC and lower than the ansatz and find the PWC and so we are  
105 confident this is not a result of a bias in the optimization of our ansatz. It is likely that if we run DMC on  
106 the full network and orbitals, the energy will lower more but that is left for future work.

|            | Mean       |
|------------|------------|
| NN-VMC     | -2.2865(2) |
| NN-BCS-VMC | -2.2999(2) |
| LDA-DMC    | -2.2991(6) |
| NNOrb-DMC  | -2.3007(2) |

TABLE III: Energies for  $V_m/W = 2$  comparing Variational Monte Carlo with Neural Network backflow to DMC with orbitals of LDA, Slater-Jastrow and those found by the neural network.

|           | $V_m/W = 2.0$ | $V_m/W = 4.0$ | $V_m/W = 6.0$ | $V_m/W = 8.0$ |
|-----------|---------------|---------------|---------------|---------------|
| NN-P      | -1.77211(6)   | -2.2833(2)    | -2.88069(7)   | -3.53534(9)   |
| NN-UP     | -1.7910(1)    | -2.2865(2)    | -2.8882(2)    | -3.5482(2)    |
| NN-BCS-UP | -1.7953(4)    | -2.2999(2)    | -2.8955(5)    | -3.5515(2)    |

TABLE IV: Ground state energies comparing Variational Monte Carlo with Neural Network backflow for the polarized system, the unpolarized system with a standard determinant and the unpolarized with a BCS type determinant.

## 107 PAIRED WIGNER CRYSTAL IN DIFFERENT LATTICES, GEOMETRIES AND DENSITIES

108 To check that the PWC is not an artifact of cell size or shape, we show various system sizes and compare  
 109 the triangular cell to the rectangular cell. All cases utilize the same filling of  $\nu = 1/4$ . This corresponds to  
 110 8 electrons on the  $4 \times 4$  lattice, 18 electrons on the  $6 \times 6$  lattice, 32 electrons on the  $8 \times 8$  lattice and 24  
 111 electrons on the  $6 \times 8$  lattice. From the charge density plots in Fig. 2 it is clear that the PWC is robust from  
 112 a  $4 \times 4$  lattice to an  $8 \times 8$  lattice and in triangular as well as rectangular cells.

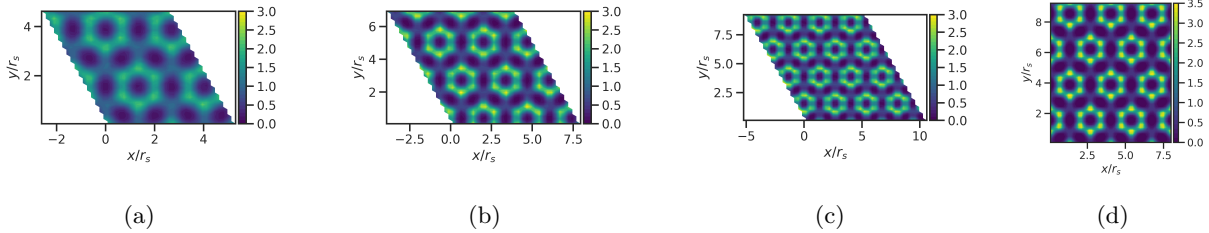

FIG. 2: Ground state charge densities are shown for  $r_s = 10$  with lattice sizes and potential depths of (a)  $4 \times 4$ ,  $V_m/W = 2.0$ , (b)  $6 \times 6$ ,  $V_m/W = 4.0$ , (c)  $8 \times 8$ ,  $V_m/W = 6.0$  and (d)  $6 \times 8$ ,  $V_m/W = 8.0$ . All simulations are done at the same filling,  $\nu = 1/4$ , as in the main text. (a-c) are in a triangular cell while (d) is in a rectangular cell.

113 To show that this phase is robust over a region accessible by various experimental devices, we also include  
 114 here the result at  $r_s = 5$  and  $r_s = 15$  whereas the results in the main text are strictly at  $r_s = 10$ . In Fig. 3  
 115 we show charge densities at  $V_M/W = 2.0$  for  $r_s = 5$  and  $r_s = 15$ . Both systems are on a  $6 \times 6$  lattice with 18  
 116 electrons and exhibit the same hexagonal PWC pattern. In sum, this gives us confidence that the phase is  
 117 robust to cell shape, is not a finite size effect and is stable over a density of at least  $r_s = 5$  to  $r_s = 15$ .

## 118 DESCRIPTIONS OF THE DENSITY FUNCTIONAL THEORY AND DIFFUSION MONTE 119 CARLO CALCULATIONS

120 In addition to the NQS calculations, we also looked for solutions of the moiré continuum Hamiltonian  
 121 Eq. (1) using traditional electronic structure methods including density functional theory (DFT) and diffusion

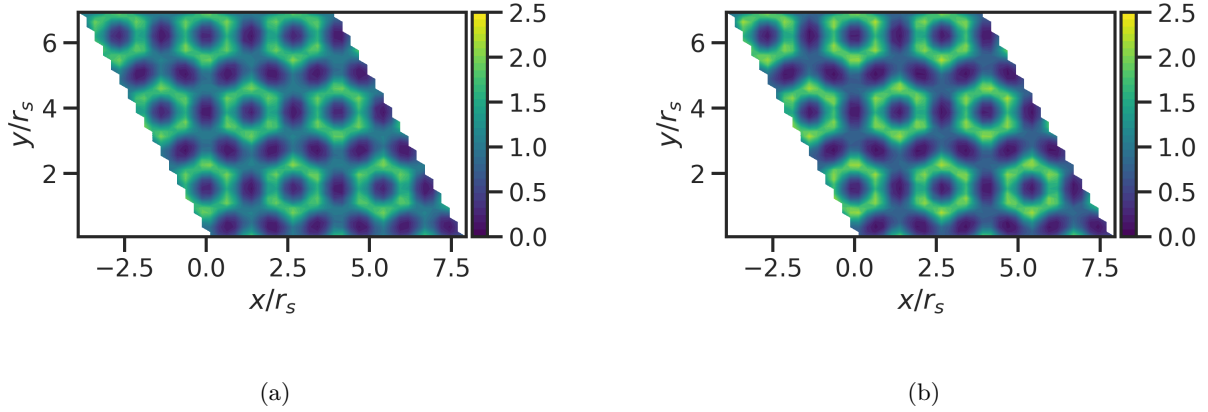

FIG. 3: Ground state charge densities are shown for  $V_m = 2.0$  at  $r_s = 5$  in (a) and  $r_s = 15$  in (b). Both simulations are done at the same filling,  $\nu = 1/4$ , as in the main text in a triangular cell on a  $6 \times 6$  lattice.

122 Monte Carlo (DMC). The numerical details are consistent with those in Refs. [9, 10], but with the system  
 123 modified to match that explored by the NQS calculations: 18 electrons in 36 moiré unit cells with periodic  
 124 boundary conditions.

125 We were unable to locate the ring state using DFT. As shown in Fig. 4, LDA predicts a gapless ferromagnetic  
 126 ground state starting in moderately deep moiré potential  $V_M/W \geq 1$  which persists in deeper potentials.  
 127 The introduction of exact exchange into LDA stabilizes an anti-ferromagnetic state. However, instead of  
 128 singlets that span hexagonal rings, this state can be viewed as two staggered triangular lattices, one formed  
 129 by up spins, while the other by down spins. As shown in Fig. 5, each electron is delocalized across two moiré  
 130 minima, forming a “bowtie” pattern. Opposite-spin electrons occupy opposing edges of what would have been  
 131 honeycomb rings from the NQS calculation. As such, this state can be viewed as the “closest” mean-field  
 132 solution that approximates the paired Wigner crystal.

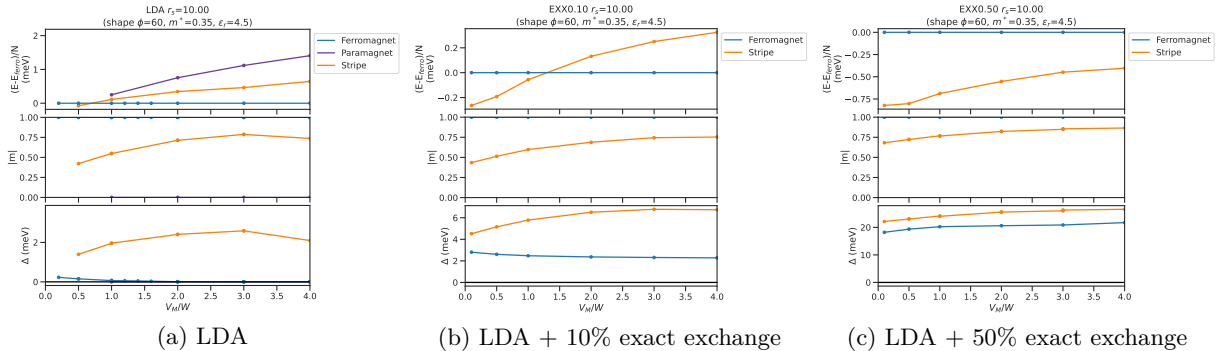

FIG. 4: DFT energy, magnetization, and gap as functions of the depth of the moiré potential at  $r_s = 10$ .

133 To obtain the energies presented in Table III, we performed DMC calculations using Slater-Jastrow trial  
 134 wavefunctions using LDA and neural-network orbitals. For each set of orbitals, we optimized short-range  
 135 two-body Jastrows and used the resultant trial wavefunctions in subsequent DMC calculations with timesteps  
 136 of  $0.25 \text{ ha}^{-1}$ , which resulted in an acceptance ratio of 99.8%. We used 1024 walkers, which is more than  
 137 sufficient for this small system of  $N = 36$  electrons.

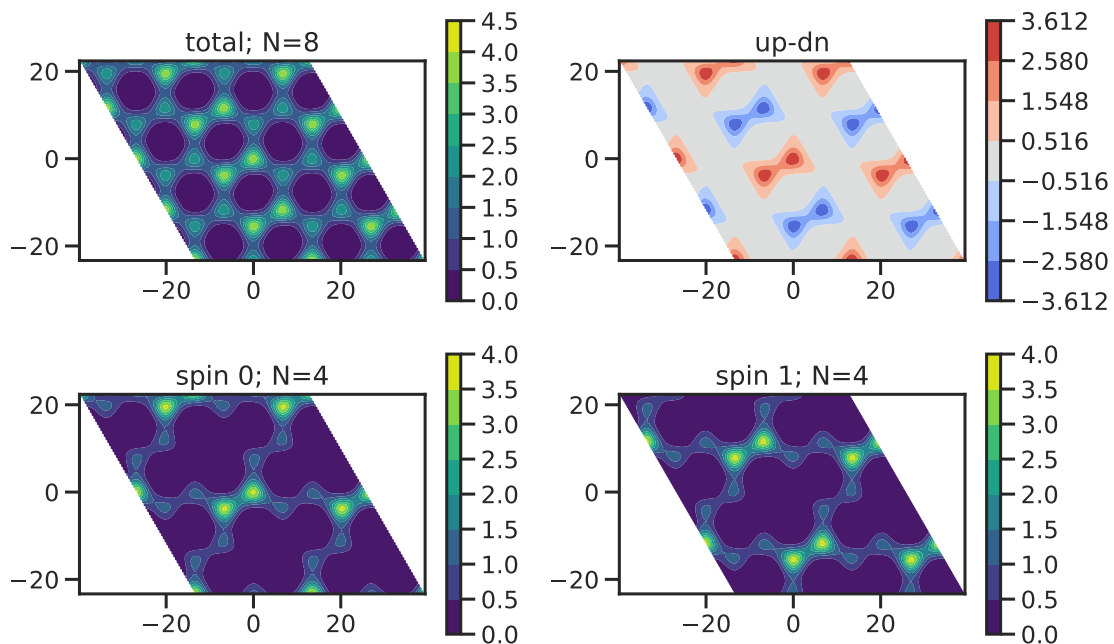

FIG. 5: Charge and spin densities of the antiferromagnetic DFT state that best approximates the paired Wigner crystal.

- 
- 138 [1] C. Smith, Y. Chen, R. Levy, Y. Yang, M. A. Morales, and S. Zhang, Physical Review Letters **133**, 10.1103/phys-  
139 revlett.133.266504 (2024).
- 140 [2] G. Pescia, J. Nys, J. Kim, A. Lovato, and G. Carleo, Phys. Rev. B **110**, 035108 (2024).
- 141 [3] D. M. Ceperley, G. V. Chester, and M. H. Kalos, Phys. Rev. D **13**, 3208 (1976).
- 142 [4] G. Goldshlager, N. Abrahamsen, and L. Lin, Journal of Computational Physics **516**, 113351 (2024).
- 143 [5] S. Sorella, Physical Review Letters **80**, 4558–4561 (1998).
- 144 [6] Y. Chen, H. Xie, and H. Wang, Efficient numerical algorithm for large-scale damped natural gradient descent  
145 (2023), arXiv:2310.17556 [cs.LG].
- 146 [7] A. Chen and M. Heyl, Nature Physics **20**, 1476–1481 (2024).
- 147 [8] J. Besag, J. Roy. Statist. Soc. Ser. B **56**, 4 (1994).
- 148 [9] Y. Yang, M. A. Morales, and S. Zhang, Phys. Rev. Lett. **132**, 076503 (2024).
- 149 [10] Y. Yang, M. A. Morales, and S. Zhang, Phys. Rev. Lett. **133**, 266501 (2024).
